# Supplementary material for: Prevalence and Self-recognition of Chronic Constipation: Results of an Internet Survey
Source: PubMed Central journal article supplement — J Neurogastroenterol Motil. 2016 Oct 1;22(4):677–85. doi: 10.5056/jnm15187 (PMC5056578; doi:10.5056/jnm15187), 2016-10-01
Supplement: JNM-22-677_appendix.pdf [file JNM-22-677_appendix.pdf]

---

**Appendix. Questionnaire Items**


---

**Q1. Do you consider yourself to be constipated?**

1. Yes,            2. No

**Q2. Do you consider constipation to be a medical condition?**

1. Yes,            2. No

**Q3. How many times a week do you typically defecate?**

- Times/week

**Q4. What is your typical defecation interval?**

- Days

**Q5. How was your appearance of stool ? (Using Bristol stool scale chart)**

1. Bristol 1 or 2,    2. Bristol 3 or 4 or 5,    3. Bristol 6 or 7

**Q6. How often did you have hard or lumpy stool ?**

1. Never or Rarely,    2. Once per 4 times,    3. Once per 3 times,    4. Once per twice,    5. Always

**Q7. How often did you strain at stool during bowel movement ?**

1. Never or Rarely,    2. Once per 4 times,    3. Once per 3 times,    4. Once per twice,    5. Always

**Q8. How often did you have a sensation that the stool could not be passed, (ie, was blocked), when having a bowel movement?**

1. Never or Rarely,    2. Once per 4 times,    3. Once per 3 times,    4. Once per twice,    5. Always

**Q9. How often did you press on or around your bottom in order to complete a bowel movement?**

1. Never or Rarely,    2. Once per 4 times,    3. Once per 3 times,    4. Once per twice,    5. Always

**Q10. How often did you have difficulty relaxing or letting go to allow the stool to come out during a bowel movement?**

1. Never or Rarely,    2. Once per 4 times,    3. Once per 3 times,    4. Once per twice,    5. Always

**Q11. How often do you experience abdominal discomfort or pain?**

1. Never or Rarely,    2. Once per 4 times,    3. Once per 3 times,    4. Once per twice,    5. Always

**Q12. How long do the above symptom(s) typically persist?**

1. Less for 3 months,            2. for 3 months to 6 months,            3. Above for 6 months

**Q13. What is your remedy for constipation?**

1. Devised meal,    2. Sleep reservation,    3. Intake of liquid,    4. Use of bidet – toilet,  
5. Avoid stress,    6. Take exercise,    7. Take OTC,    8. Visit hospital
- 

OTC, over the counter.
